# Supplementary material for: Construction of CsPbBr3/carboxyl-modified rGO heterostructures for efficient photocatalytic reduction of CO2 to methanol
Source: Royal Society of Chemistry journal article supplement (doi:10.1039/d4ce00036f), 2024-01-01
Supplement: d4ce00036f1.pdf [file d4ce00036f1.pdf]

## Supporting Information

### Construction of CsPbBr<sub>3</sub>/Carboxyl-modified rGO Heterostructures for Efficient Photocatalytic Reduction of CO<sub>2</sub> to Methanol

Meng Li,<sup>a</sup> Jingtao Xu,<sup>b</sup> Yang Song,<sup>a,c</sup> Yuanyuan Li,<sup>a</sup> Jin Wang,<sup>a</sup> Feiyong Chen<sup>\*a,c</sup>

a. Resources and Environment Innovation Institute, Shandong Jianzhu University, Jinan, 250101, P. R. China

b. School of Municipal and Environmental Engineering, Shandong Jianzhu University, Jinan 250101, P. R. China

c. Huzhou Nanxun Dist. Jianda Ecol Environm Innovat Ct, Shandong Jianzhu University, Jinan 250101, P. R. China

Table S1 The preparation conditions of samples

| Sample | CsPbBr <sub>3</sub> NCs (2 μM) | rGO-COOH (2.825 mg/mL) |
|--------|--------------------------------|------------------------|
| 1      | 0.5 mL                         | 2 mL                   |
| 2      | 1 mL                           | 2 mL                   |
| 3      | 1.5 mL                         | 2 mL                   |
| 4      | 2 mL                           | 2 mL                   |
| 5      | 4 mL                           | 2 mL                   |

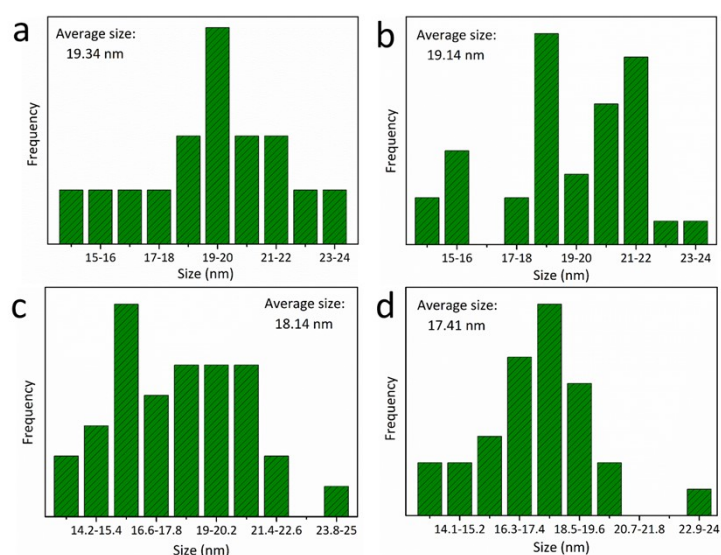

Figure S1 The size-distribution histograms of sample 1-4.

Table S2 Summary of the ICP-MS analysis results of the sample 4.

|                   | Cs    | Pb    | Br    |
|-------------------|-------|-------|-------|
| ppm               | 0.184 | 0.328 | 0.416 |
| $\mu\text{mol/L}$ | 1.38  | 1.58  | 5.20  |

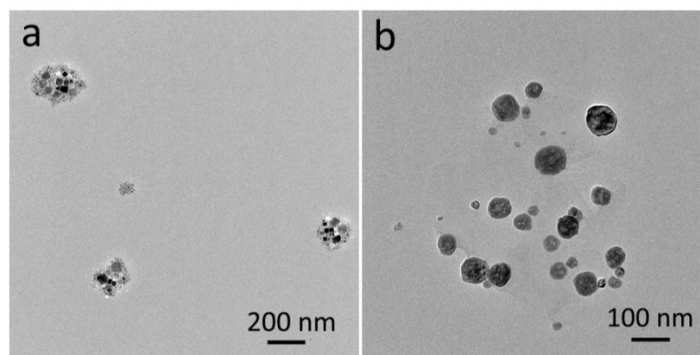

Figure S2 TEM image of the contrast sample which was prepared with the same conditions with sample 4 except using rGO without the decoration of -COOH.

Table S3 Raman information of samples

| Sample   | $I_D$  | $I_G$  | $I_D/I_G$ |
|----------|--------|--------|-----------|
| rGO      | 147.63 | 130.48 | 1.131     |
| rGO-COOH | 204.56 | 153.03 | 1.337     |
| 4        | 360.00 | 317.00 | 1.356     |

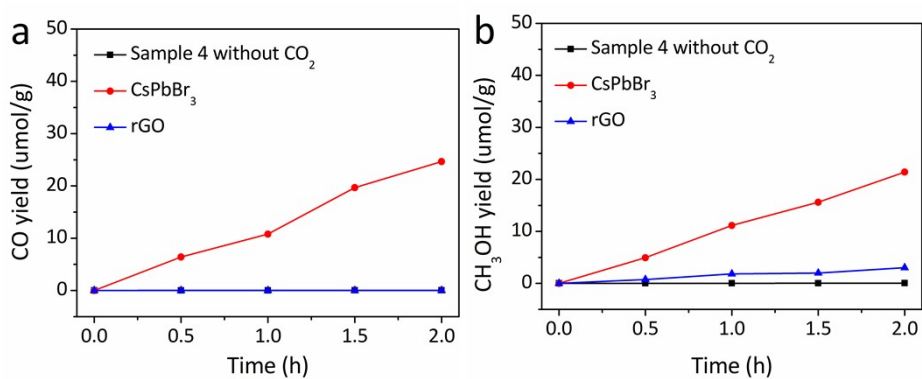

Figure S3 CO (a) and  $\text{CH}_3\text{OH}$  (b) yield plots of  $\text{CsPbBr}_3$ , rGO, and the blank experiment as the function of reaction time.

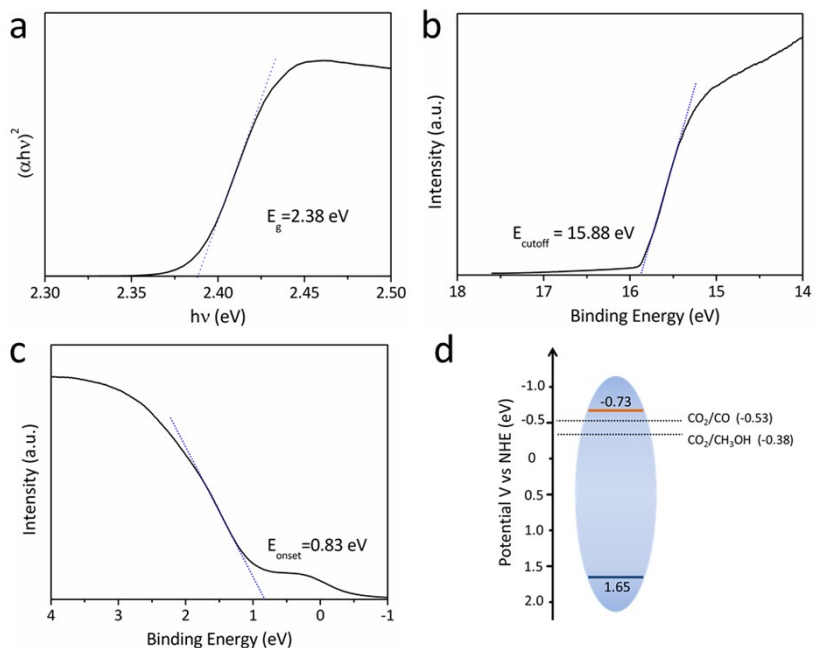

Figure S4 Tauc plot (a), UPS spectra of the secondary edge region (b) and the HOMO region (c), schematic illustration of energy band structure (d) for sample 4. The Tauc plot was obtained from the corresponding UV-vis diffuse reflectance spectrum according to the formula 1 where  $\alpha$ ,  $h$ ,  $\nu$ ,  $A$ , and  $E_g$ , is absorption coefficient, Planck constant, light frequency, constant, and band gap, respectively. The value of  $n$  is  $1/2$  for direct band gap semiconductor. The UPS measurement was carried out using a He I ( $h\nu = 21.2$  eV) source.  $E_{HOMO/VBM}$  was calculated using formula 2.

$$(\alpha h\nu)^{\frac{1}{n}} = A(h\nu - E_g) \quad (1)$$

$$E_{HOMO/VBM} = h\nu - (E_{cutoff} - E_{onset}) \quad (2)$$

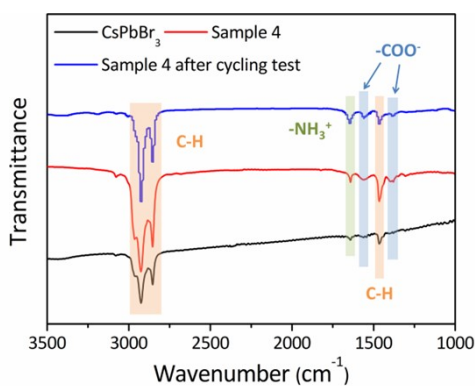

Figure S5 FTIR spectra of the parent  $\text{CsPbBr}_3$  NCs, sample 4 before and after 10th cycling test.

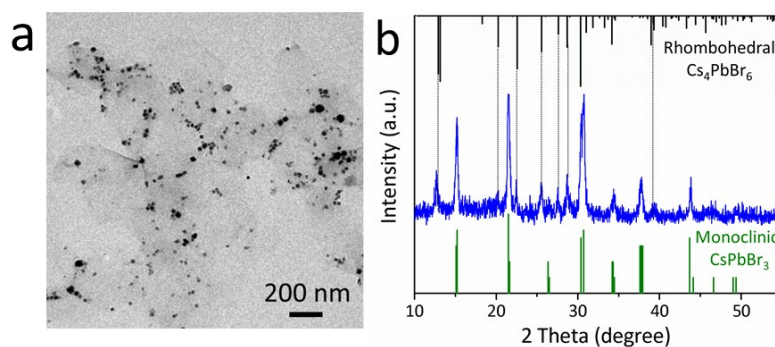

Figure S6 TEM image (a) and XRD pattern (b) of sample 4 after 10th cycling test.

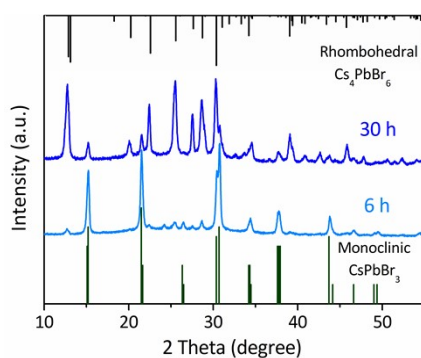

Figure S7 XRD patterns of sample 4 with different exposure time at 70% relative humidity and room temperature.

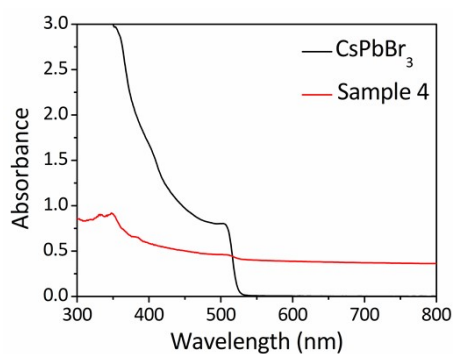

Figure S8 The absorption spectra of the parent  $\text{CsPbBr}_3$  NCs and sample 4.

Table S4 Components  $B_1$  and  $B_2$ , time constants  $\tau_1$  and  $\tau_2$ , and average lifetime  $\tau$  of the parent  $\text{CsPbBr}_3$  NCs and sample 4.

| Sample            | $\tau_1$ | $B_1$ | $\tau_2$ | $B_2$ | $\tau_{\text{average}}$<br>(ns) |
|-------------------|----------|-------|----------|-------|---------------------------------|
| $\text{CsPbBr}_3$ | 9.37     | 25.12 | 48.06    | 74.88 | 45.68                           |
| 4                 | 1.15     | 7.14  | 72.74    | 27.26 | 5.34                            |

\* A biexponential function was applied to fit the decay curves:

$$F(t) = A + B_1 \exp(-t/\tau_1) + B_2 \exp(-t/\tau_2)$$

in which  $B_1$  and  $B_2$  is the normalized amplitudes of each component.  $\tau_1$  and  $\tau_2$  represent the time constants. The shorter lifetime component is assigned to the exciton recombination and the longer lifetime component is associated with the surface related emission.

The average lifetime ( $\tau_{average}$ ) was calculated by:

$$\tau_{average} = (B_1 \tau_1^2 + B_2 \tau_2^2) / (B_1 \tau_1 + B_2 \tau_2)$$

#### **Calculation of CO<sub>2</sub> conversion efficiency.**

CO<sub>2</sub> conversion efficiency was calculated by the C content of products and the total amount of CO<sub>2</sub> in the reaction system.

$$CO_2 \text{ conversion efficiency} = \frac{n(C_{product})}{n(C_{total CO_2})} = \frac{n(CO) + n(CH_3OH)}{n(CO_2)}$$

The reaction chamber was 40 mL filled with 1.4\*10<sup>13</sup>25 Pa CO<sub>2</sub>. The temperature is 353 K. Calculated by Ideal Gas Law (PV=nRT), CO<sub>2</sub> is 0.0019 mol. After reaction 2h, according to the yield of CO and CH<sub>3</sub>OH, CO<sub>2</sub> conversion efficiency of sample 1, 2, 3, 4 was 0.008%, 0.014%, 0.021%, 0.028%.
